# Supplementary material
Source: PubMed Central journal article supplement (PMC2579638)
Supplement: jc.2008-0396_1.pdf [file jc.2008-0396_1.pdf]

|              | Gender | Age (years) | Ethnicity | BMI (Kg/m <sup>2</sup> ) | Cause of death trauma | Diabetes duration (years) | Blood glucose (mg/dl) | Chronic diseases | Cold ischemia (hours) | Diabetes treatment       |
|--------------|--------|-------------|-----------|--------------------------|-----------------------|---------------------------|-----------------------|------------------|-----------------------|--------------------------|
| Diabetic     |        |             |           |                          |                       |                           |                       |                  |                       |                          |
| D2           | M      | 74          | C         | 26.0                     | CVA                   | 8                         | 367                   | NA               | 11.0                  | Metformin                |
| D3           | F      | 68          | C         | 29.4                     | CVA                   | NA                        | 294                   | NA               | 12.15                 | insulin                  |
| D1           | M      | 63          | C         | 29.4                     | CVA                   | 6                         | 266                   | NA               | 8.52                  | insulin                  |
| DM2          | M      | 64          | C         | NA                       | CVA                   | 3                         | NA                    | NA               | 17.41                 | Glipizide                |
| D6           | F      | 74          | C         | 28.6                     | NA                    | 8                         | 181                   | NA               | 5.0                   | Sufonylurea              |
| D7           | M      | 69          | C         | 33.6                     | CVA                   | 6                         | 162                   | NA               | 11.0                  | Metfomin and Sulfonyurea |
| D8           | M      | 61          | C         | 27.8                     | CVA                   | NA                        | 195                   | NA               | 9.2                   | Insulin                  |
| D9           | M      | 79          | C         | 25.9                     | CVA                   | 3                         | 267                   | NA               | NA                    | Gliclazide               |
| D            | M      | 56          | C         | 31.0                     | CVA                   | 3                         | 190                   | NA               | 6.0                   | NA                       |
| D            | F      | 65          | C         | 46                       | CVA                   | NA                        | 278                   | HT, COPD         | 11.48                 | Oral agents              |
| Non-diabetic |        |             |           |                          |                       |                           |                       |                  |                       |                          |
| H13          | F      | 67          | C         | 39                       | CVA                   | -                         | 164                   | NA               | 8.07                  | -                        |
| H16-2        | F      | 65          | C         | 34                       | CVA                   | -                         | 179                   | NA               | 6.33                  | -                        |
| H03          | F      | 62          | C         | 22.4                     | CVA                   | -                         | 154                   | NA               | 4.55                  | -                        |
| H18          | M      | 60          | C         | 31                       | CVA                   | -                         | 190                   | NA               | 10.51                 | -                        |
| H6           | M      | 59          | C         | 36.4                     | Surgical accident     | -                         | NA                    | NA               | NA                    | -                        |
| H7           | M      | 52          | C         | 26                       | CVA                   | -                         | 178                   | NA               | 4.34                  | -                        |
| H8           | M      | 54          | C         | 34.2                     | CVA                   | -                         | 198                   | HT               | 4.54                  | -                        |
| H14          | F      | 64          | C         | 27.1                     | CVA                   | -                         | 152                   | HT               | 6.31                  | -                        |
| H16          | M      | 57          | C         | 27.7                     | Trauma                | -                         | 160                   | HT, HC           | 7.0                   | -                        |

Legend table1:

NA; not available, M; male, F; female, C; caucasian, CVA; cardiovascular accident, HT; hypertension, HC; hypercholesteremia, COPD; chronic obstructive pulmonary disease, BMI; body mass index
