# Supplementary material
Source: PubMed Central journal article supplement (PMC2579638)

Supplemental figure 1

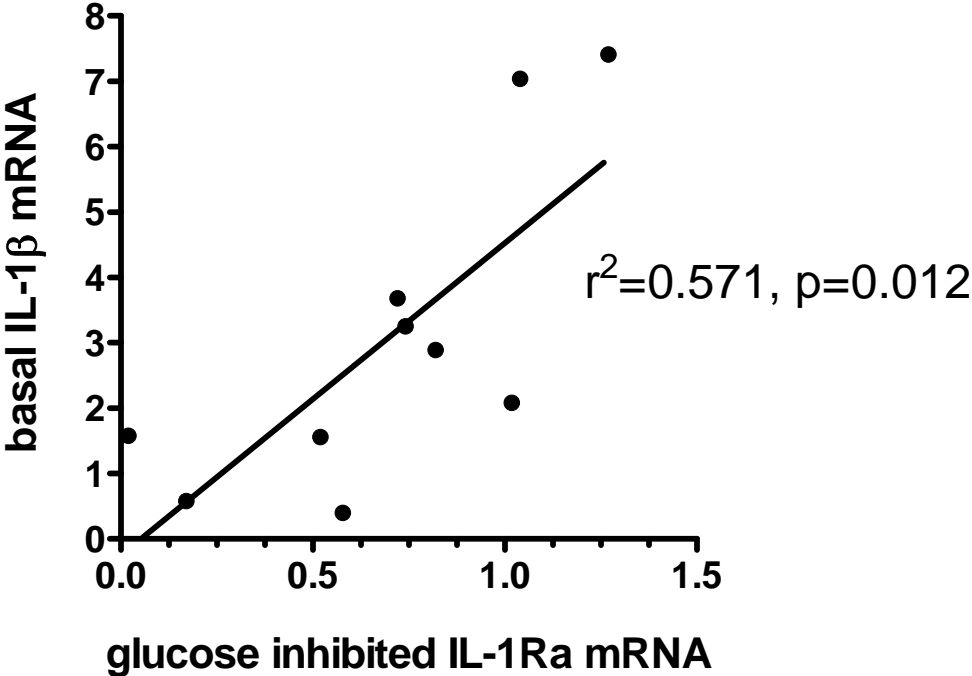

Supplement: jc.2008-0396_2.pdf [file jc.2008-0396_2.pdf]

Supplemental figure 2

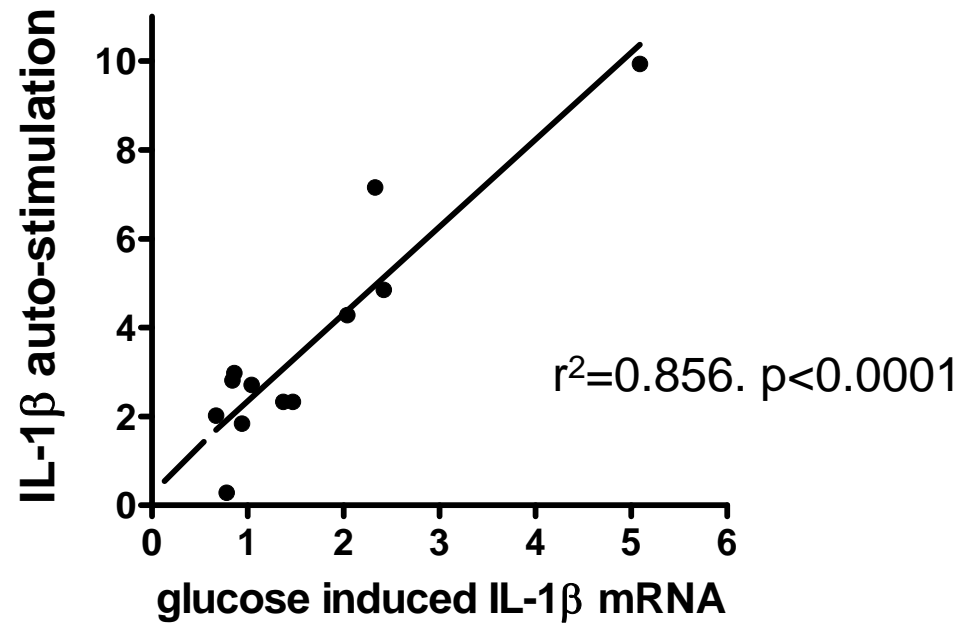

Supplement: jc.2008-0396_3.pdf [file jc.2008-0396_3.pdf]
